# Supplementary material for: Suppression of Selective Voltage‐Gated Calcium Channels Alleviates Neuronal Degeneration and Dysfunction through Glutathione S‐Transferase‐Mediated Oxidative Stress Resistance in a Caenorhabditis elegans Model of Alzheimer’s Disease
Source: Hindawi journal article supplement (doi:10.1155/2022/8287633), 2022-01-01

# Supplementary Figure S1

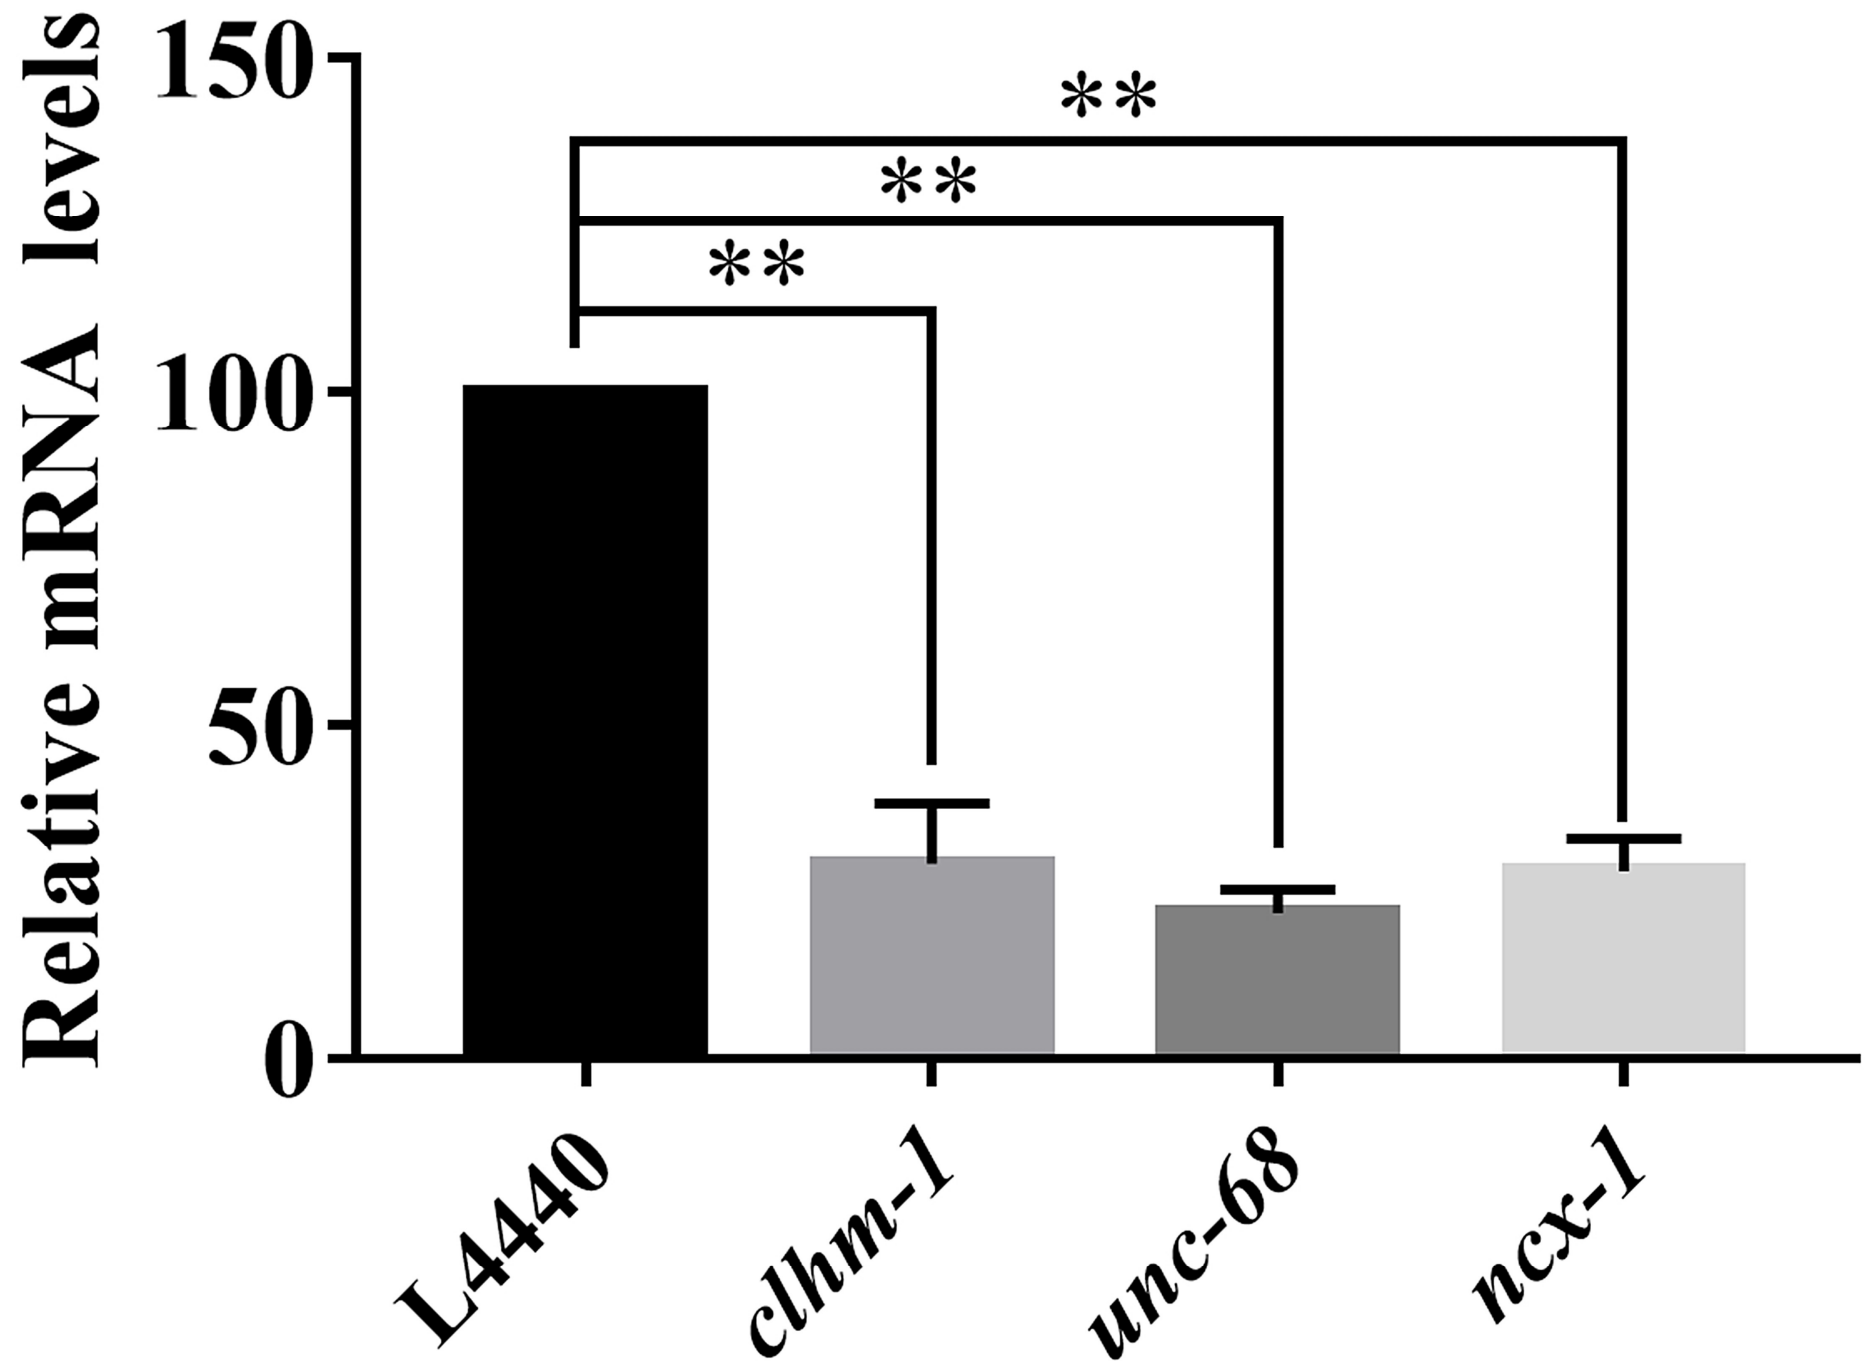

Supplement: f1 [file 8287633.f1.pdf]
