# Supplementary material for: Suppression of Selective Voltage‐Gated Calcium Channels Alleviates Neuronal Degeneration and Dysfunction through Glutathione S‐Transferase‐Mediated Oxidative Stress Resistance in a Caenorhabditis elegans Model of Alzheimer’s Disease
Source: Hindawi journal article supplement (doi:10.1155/2022/8287633), 2022-01-01
Supplement: f3 [file 8287633.f3.pdf]

## Supplementary Table S2

### RNAi primer

| Gene name     | Forward                 | Reverse                 |
|---------------|-------------------------|-------------------------|
| <i>clhm-1</i> | ATACTGCAGCGTGCGAACAAGGG | CATGGTACCGGCTGTGGAAATGG |
| <i>unc-68</i> | ATAGGTACCCACTTGGCAACCAT | AATCTGCAGTGGTGAATGCTGCT |
| <i>ncx-1</i>  | ATACTGCAGGTGGAATCAGGGCA | CTCGGTACCGTCATGTGGCTCAT |

### qRT-PCR primer

| Gene name                        | Forward                  | Reverse                 |
|----------------------------------|--------------------------|-------------------------|
| <i>human-A<math>\beta</math></i> | GATGCAGAATTCCGACATGA     | TCGCTATGACAACACCGCCCA   |
| <i>act-3</i>                     | ATCCGTAAGGACTTGTACGCCAAC | GGCGATGATCTTGATCTTCATGG |
| <i>gst-3</i>                     | ATTTAATGCACGCGGACTT      | CCTCTGCAGTTTGACCAACA    |
| <i>gst-8</i>                     | CGATCGCTGATCAGTTCAAA     | CTGAGCAATGAGCAAATCCA    |
| <i>gst-9</i>                     | CAAGTTGATGCTCTCGGTGA     | GGCCAAATCCATCCAAGTTA    |
| <i>gst-12</i>                    | CCGAAAATCAGTGAAGAA       | AGCTGCAATTTTTGGTTGCT    |
| <i>gst-20</i>                    | TTTTAACGGACGAGGATTGG     | GATTTGGAGTCCCGAAGTGA    |
| <i>gst-21</i>                    | TGACATGAAAACGGGATTGA     | CCGCTTGAGCTTCCTCTATG    |
| <i>gst-24</i>                    | GAAATCGAGCGAATCCAAAAG    | CTGCAAGCTTCTGCTCCTCTC   |
| <i>gst-25</i>                    | ATGGACTCAACGGAACCAAC     | TCAAGACGTGCGAGATGTTT    |
| <i>gst-30</i>                    | CCCATGCAATTTCTCGTTTTT    | CTCCTTGTGCAAATCCCATTT   |
| <i>gst-31</i>                    | CTCTCGATTCTACGCCGAAC     | GTTGCAAGGTAGCGGATGAT    |
| <i>gst-35</i>                    | ATTTGGAAGATTCCCGATCC     | TCCGGTTTTCCACTTTTCTG    |
| <i>gst-38</i>                    | CGGAGGCTCTTTACACAAGC     | CTTTTCACGTCCCAGCAAAT    |
| <i>skn-1</i>                     | CTCCATTCGGTAGAGGACCA     | GGCGCTACTGTCGATTTCTC    |
| <i>gst-4</i>                     | TGCTCAATGTGCCTTACGAG     | AGTTTTTCCAGCGAGTCCAA    |
| <i>gst-7</i>                     | AATTCGTGGAGCTGGAGAGAT    | CAGCAACCGAGTTGACTTGA    |
| <i>gst-10</i>                    | ATTCGAAGACATTCGGTTCG     | AACATGTCGAGGAAGGTTGC    |
| <i>gstk-1</i>                    | GGTGTTAAGAATCCGGAGCA     | AGAAGGTCGGCAATCAAATG    |
| <i>gpx-7</i>                     | GTCGACGGGGACAATTTATG     | AATTGGTTGCATGGAAAAGC    |
